# Supplementary material for: Intracellular Sugar Transporters Facilitate Cellulase Synthesis in Trichoderma reesei Using Lactose
Source: MDPI journal article supplement (doi:10.3390/biom13020295), 2023-02-04
Supplement: s1 [file s1]

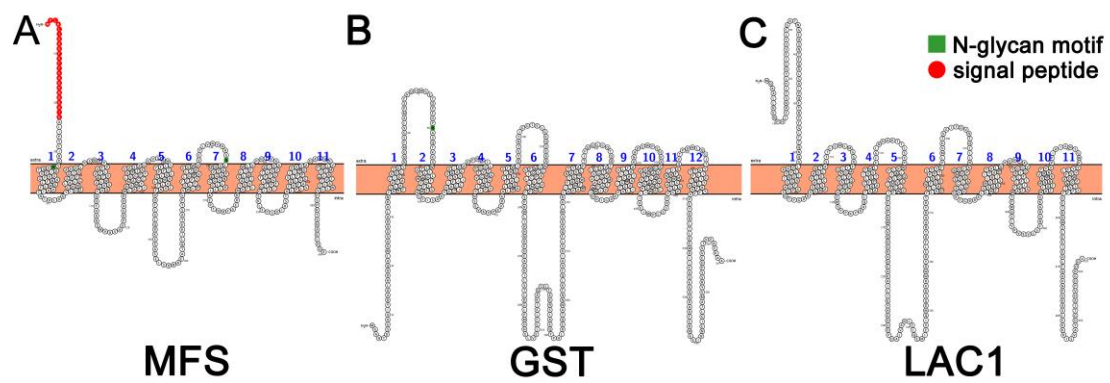

**Figure S1** Bioinformatic analysis of transmembrane domains of sugar transporters MFS, GST, and LAC1 obtained from the webserver Protter (<http://wlab.ethz.ch/protter/#>). The green square represents N-glycosylation motif and red circle represents the signal peptide.

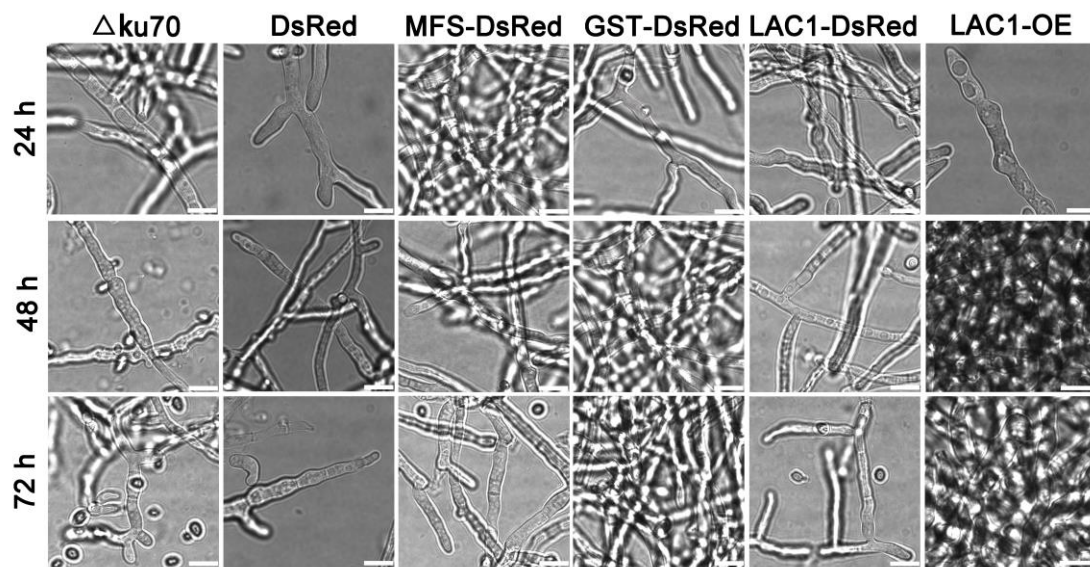

**Figure S2** Brightfield images of *T. reesei* strains  $\Delta ku70$ , DsRed, MFS-DsRed, GST-DsRed, LAC1-DsRed and LAC1-DsRed-OE (LAC1-OE) cultured in TMM+2% lactose at 24 h, 48 h, and 72 h, respectively. Scale bar = 10  $\mu m$ .

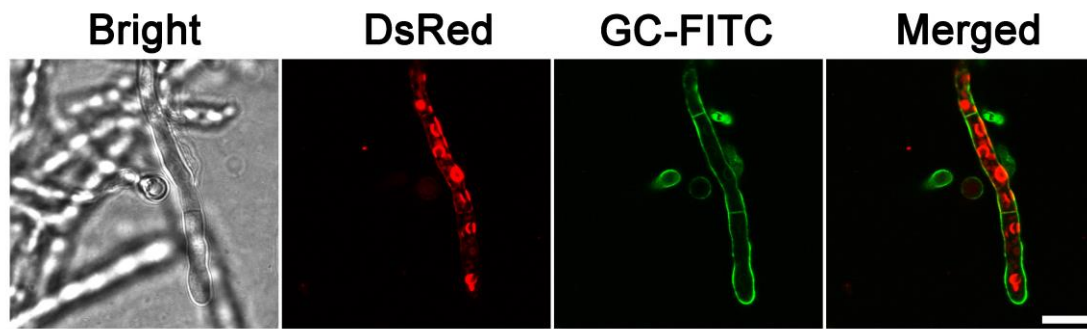

**Figure S3** Confocal images of strain MFS-DsRed stained with GC-PEG-cholesterol-FITC, a green fluorescence dye for cell walls. Strain MFS-DsRed was grown on lactose for 72 h. Scale bar = 10  $\mu\text{m}$ .

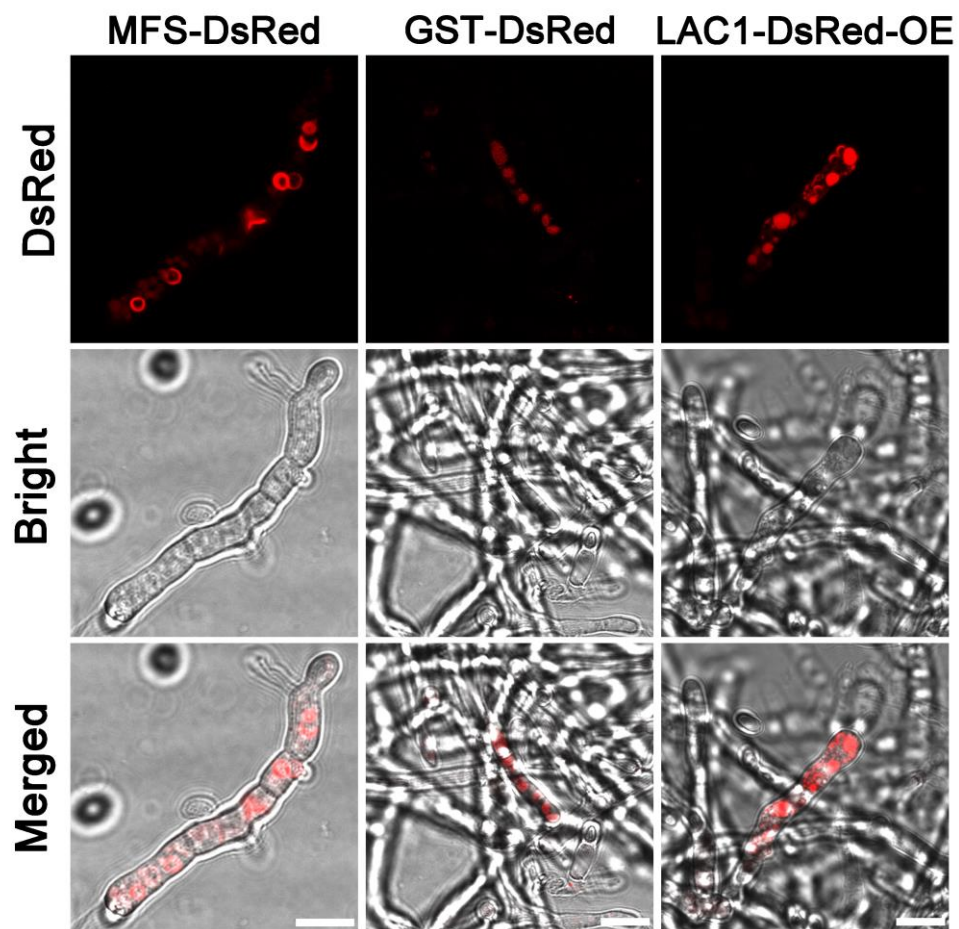

**Figure S4** Cellular location of MFS-DsRed, GST-DsRed, and LAC1-DsRed-OE at the apical regions of recombinant strains MFS-DsRed, GST-DsRed, and LAC1-DsRed-OE cultured on lactose for 72 h. Scale bar = 10 $\mu$ m.

**GST** D M L Q G I T Y G T Y I L F G I I T Y L G A A F V Y F F V P E T K R L T L E E M D I I F G S E G A A R A D F E R M E E I  
**LAC1** I A I A N S G W K Y Y F L Y V F W D A F G V I V I Y F F F V E T R D W S L E E I E D L F Q A K N P V K A S L E K K R I S  
**MFS** V V S A D A G V K V L Q P M L I A L L T V T A I S W L L V P S P K T S N A E L H Q E . . . . .

**Figure S5** Bioinformatic analysis of ER localization signal motif of sugar transporters

MFS, GST, and LAC1. The ER localization signal motifs KKXX were highlighted with blue background. The amino acids in red background and white character are strictly identical, in red character are similar in protein sequence, and in blue frame are similar across protein sequences.

Table S1 Primers used for gene amplification, verification, and qRT-PCR

| Primer name                                                             | Sequence (5' → 3')                                  |
|-------------------------------------------------------------------------|-----------------------------------------------------|
| <b>Primers for qRT-PCR</b>                                              |                                                     |
| q-crt1-F                                                                | GACTACTCGTGGCGACTCAT                                |
| q-crt1-R                                                                | GGACTCGGGCAGGAACAT                                  |
| q-mfs-F                                                                 | CCGGAGTCAACGATGGAG                                  |
| q-mfs-R                                                                 | CTGGCGGAGGTGGGTATT                                  |
| q-gst-F                                                                 | TGGCAAGCAGAGTGAAGC                                  |
| q-gst-R                                                                 | GCGGTTGTGGTGGATGAG                                  |
| q-lac1-F                                                                | TTCGGCATCACCCTCAG                                   |
| q-lac1-R                                                                | CAAGGACCAGCGACAAAA                                  |
| q-sar1-F                                                                | TGGATCGTCAACTGGTTCTACGA                             |
| q-sar1-R                                                                | GCATGTGTAGCAACGTGGTCTTT                             |
| q-cel3a-F                                                               | ATGCGTTACCGAACAGCAGCTGC                             |
| q-cel3a-R                                                               | TGCGGCCTTCGCCTTGTCGTAC                              |
| q-cel7a-F                                                               | GCGGATCCTCTTTCTCAGAC                                |
| q-cel7a-R                                                               | TTGGCGTAGTAATCATCCCA                                |
| q-cel7b-F                                                               | ACTACACGGAGGAGCTCGACGACTT                           |
| q-cel7b-R                                                               | AAGGCATTGCGAGTAGTAGTCGTTG                           |
| q-bxl1-F                                                                | CGAGTTTGGCAGTGGTCTCT                                |
| q-bxl1-R                                                                | TGTGCGAACAACAGCATGG                                 |
| q-xyr1-F                                                                | TACCAAGTGCGATGGCTTAC                                |
| q-xyr1-R                                                                | CTCTCTCGGACATATTCGCA                                |
| q-ace3-F                                                                | CCCAAGTACTCGTGGCACAT                                |
| q-ace3-R                                                                | ATGGTGATGGGCCGATTGTT                                |
| q-clr2-F                                                                | CTCCCTGCTCAACATGGTCTTT                              |
| q-clr2-R                                                                | GGATGTGCTCTATGGCTTGGTT                              |
| q-xpp1-F                                                                | AGTTTGACGAGGATGCCGAC                                |
| q-xpp1-R                                                                | CGCTGTCGTCGAGAAAGTCTT                               |
| q-clr3-F                                                                | GACAGCACCGTCGATACTCACA                              |
| q-clr3-R                                                                | AGGTAGCAGACCAGCGAAAGGA                              |
| q-crt1-F1                                                               | CCTTTTCCAGCTTTGCCACC                                |
| q-crt1-R1                                                               | CTCTTCCAAAGTGCGTCCCT                                |
| q-stp1-F                                                                | GCAGTCCATCGGCATCCATA                                |
| q-stp1-R                                                                | TACCACCGAACGAGGCAAAG                                |
| q-xyl1-F                                                                | GCTCAAGCTCAACAGCGGATAT                              |
| q-xyl1-R                                                                | AGTCACAGGCACCGTCAAACAG                              |
| <b>Primers for gene amplification and verification in gene deletion</b> |                                                     |
| mfs-UP-F                                                                | ATTATTATGGAGAAA <b>CTCGAG</b> AGCGGGCTTGAAGCTGTAG   |
| mfs-UP-R                                                                | CCGTCACCAGCCCTG <b>CTCGAG</b> TCGCTTTGTCTGAGGCTACG  |
| mfs-DO-F                                                                | GTGAGGGTTAATTGCGC <b>GGATCC</b> GTGGTGACTGATACGCGAT |

|                  |                                                            |
|------------------|------------------------------------------------------------|
| mfs-DO-R         | CAGGTCGACTCTAGAGA <b>GGATCC</b> GCCATCTTGCCGCTTTT<br>AC    |
| gst-UP-F         | ATTATTATGGAGAAA <b>CTCGAG</b> GAGACGGTGTTACATGCTT          |
| gst-UP-R         | CCGTCACCAGCCCTG <b>CTCGAG</b> TTGTGAGGAGGAGAGACA<br>GATA   |
| gst-DO-F         | GTGAGGGTTAATTGCGC <b>GGATCC</b> AATAGCGGAAGCACCG<br>GGGC   |
| gst-DO-R         | CAGGTCGACTCTAGAGA <b>GGATCC</b> TGGGGCAACCTTCCAC<br>GCAA   |
| lac1-UP-F        | ATTATTATGGAGAAA <b>CTCGAG</b> GCCAATGTCAAGGCGGTTT          |
| lac1-UP-R        | CCGTCACCAGCCCTG <b>CTCGAG</b> TGCGAGACGCTGTCATGCA          |
| lac1-DO-F        | GTGAGGGTTAATTGCGC <b>GGATCC</b> ACAAGTGAAGGCGAGT<br>GTAGTC |
| lac1-DO-R        | CAGGTCGACTCTAGAGA <b>GGATCC</b> TTTCCTGTCGCAAGAG<br>CAA    |
| Del-yz-UP-R      | TCATTGACTGGAGCGAGGCGATGA                                   |
| Del-yz-DO-F      | GGGGATCAGCAATCGCGCATAT                                     |
| Del-mfs-yz-UP-F  | CTTCCGACTTGACGGCACC                                        |
| Del-mfs-yz-DO-R  | TTGCTACGGGGTCTGGGGAACT                                     |
| Del-gst-yz-UP-F  | ATATTGCCGCAACTTGAGGACTG                                    |
| Del-gst-yz-DO-R  | CGGAGAACCGCACCCAACCTAT                                     |
| Del-lac1-yz-UP-F | TTGGCCACCTGCATCTGTTGAAGC                                   |
| Del-lac1-yz-DO-R | CACGGTTGCGTTGTGCTCATCA                                     |

**Primers for gene expression at its endogenous locus and for gene over-expression**

|               |                                                            |
|---------------|------------------------------------------------------------|
| mfs-Red-UP-F  | ATTATTATGGAGAAA <b>CTCGAG</b> ATGTACTGAAGCTCATCA<br>GCGC   |
| mfs-Red-UP-R  | CCGAGCCACCGCCACC <b>CTCGAG</b> CTCTTGATGCAGCTCGGC          |
| mfs-Red-DO-F  | GTGAGGGTTAATTGCGC <b>GGATCC</b> GTGGTGACTGATACGCG<br>A     |
| mfs-Red-DO-R  | CAGGTCGACTCTAGAGA <b>GGATCC</b> CATAGCCCTGCCATCTT<br>G     |
| gst-Red-UP-F  | ATTATTATGGAGAAA <b>CTCGAG</b> ATGGGCGCGCACACCGA            |
| gst-Red-UP-R  | CCGAGCCACCGCCACC <b>CTCGAG</b> AGCGGCCTTCTCAGCTTC<br>AAC   |
| gst-Red-DO-F  | GTGAGGGTTAATTGCGC <b>GGATCC</b> AATAGCGGAAGCACCG<br>GGGCG  |
| gst-Red-DO-R  | CAGGTCGACTCTAGAGA <b>GGATCC</b> CCGCAGCACCGGCGTA<br>GTATCG |
| lac1-Red-UP-F | ATTATTATGGAGAAA <b>CTCGAG</b> ATGCAAGCCGCGCTGCTAC          |
| lac1-Red-UP-R | CCGAGCCACCGCCACC <b>CTCGAG</b> AACATCGTCCCTACCATC<br>TGGC  |
| lac1-Red-DO-F | GTGAGGGTTAATTGCGC <b>GGATCC</b> ACAAGTGAAGGCGAGT<br>GTAGTC |

|                |                                                          |
|----------------|----------------------------------------------------------|
| lac1-Red-DO-R  | CAGGTCGACTCTAGAGA <b>GGATCC</b> GGCAAAAAGCAGTATG<br>GGAC |
| lac1-OE-UP     | ACCCAATAGTCAAT <b>TCTAGAA</b> TGCAAGCCGCGCTGCTAC         |
| lac1-OE-DO     | CTGCTGCTGCCGCT <b>TCTAGAA</b> ACATCGTCCCTACCATCTG<br>GC  |
| Red-yz-UP-R    | TCTCGAACTCGTGGCCGT                                       |
| Red-yz-DO-F    | GGGGATCAGCAATCGCGCATAT                                   |
| mfs-R-yz-UP-F  | CCTCCCTTCGGACTCTTT                                       |
| mfs-R-yz-DO-R  | TCATCACCTCCTCCACCCAACA                                   |
| gst-R-yz-UP-F  | GCCATTGATGCTGGTCCG                                       |
| gst-R-yz-DO-R  | CGGAGAACCGCACCCAACCTAT                                   |
| lac1-R-yz-UP-F | GCGCTGTCCTGCAAACCTG                                      |
| lac1-R-yz-DO-R | GCTCACTTTCTGGCGGCGTTTT                                   |

---
